# Supplementary material
Source: ML conference proceedings conference paper supplement (https://openreview.net/forum?id=QJSrgYcf4b)
Supplement: supplementary_material [file user study data.xlsx]

## Sheet: XM Dashboard Export Aug 14
first_answer_good	first_answer_bad	second_answer_good	second_answer_bad	third_answer_good	third_answer_bad	fourth_answer_good	fourth_answer_bad	fifth_answer_good	fifth_answer_bad	sixth_answer_good	sixth_answer_bad	seventh_answer_good	seventh_answer_bad	eighth_answer_good	eighth_answer_bad	Q118 - What is your highest level of education? （including studying program)
4	1	1	3	5	1	1	2	5	1	1	3	1	3	4	1	Master/MPhil
5	1	2	1	1	3	4	1	5	1	2	1	4	1	1	3	Less than high school
5	1	2	1	4	1	4	1	4	1	4	1	1	3	1	3	Bachelor
4	1	4	1	4	1	5	1	1	3	2	1	5	1	5	1	Bachelor
4	1	1	3	1	3	1	2	3	1	1	3	3	1	5	1	Bachelor
4	1	5	1	5	1	5	1	4	1	1	2	4	1	5	1	Master/MPhil
5	1	5	1	1	2	1	5	5	1	1	5	1	2	4	1	PhD
2	1	5	1	1	5	1	3	1	5	4	1	4	1	4	1	Master/MPhil
4	1	1	2	5	1	2	1	4	1	1	2	2	1	1	3	Master/MPhil
1	2	5	1	1	2	1	3	1	3	1	4	4	1	4	1	PhD
1	2	4	1	4	1	1	3	5	1	5	1	1	5	5	1	PhD
1	2	3	1	4	1	1	5	2	1	2	1	1	5	5	1	PhD
1	3	0	0	1	3	1	3	2	1	1	5	5	1	1	2	Master/MPhil
1	3	1	3	4	1	4	1	1	3	1	3	4	1	1	2	Bachelor
1	3	4	1	1	2	4	1	1	3	4	1	1	3	2	1	PhD
1	3	4	1	1	2	1	4	1	4	1	3	1	2	2	1	Bachelor
1	4	1	2	1	2	1	5	4	1	4	1	1	2	1	3	PhD
1	5	4	1	1	3	4	1	2	1	5	1	1	2	4	1	PhD
